# Supplementary material for: Hydrophobic Cr–Si mixed oxides as a catalyst for visible light-induced partial oxidation of cyclohexane
Source: Royal Society of Chemistry journal article supplement (doi:10.1039/c0nj00423e), 2010-01-01
Supplement: c0nj00423e.pdf [file c0nj00423e.pdf]

## Hydrophobic Cr-Si mixed oxides as a catalyst for visible light-induced partial oxidation of cyclohexane

Yasuhiro Shiraishi,\* Hiroshi Ohara and Takayuki Hirai

Research Center for Solar Energy Chemistry, and Division of Chemical Engineering,  
 Graduate School of Engineering Science, Osaka University, Toyonaka 560-8531, Japan

E-mail: shiraish@cheng.es.osaka-u.ac.jp

### Electronic Supplementary Information (ESI†)

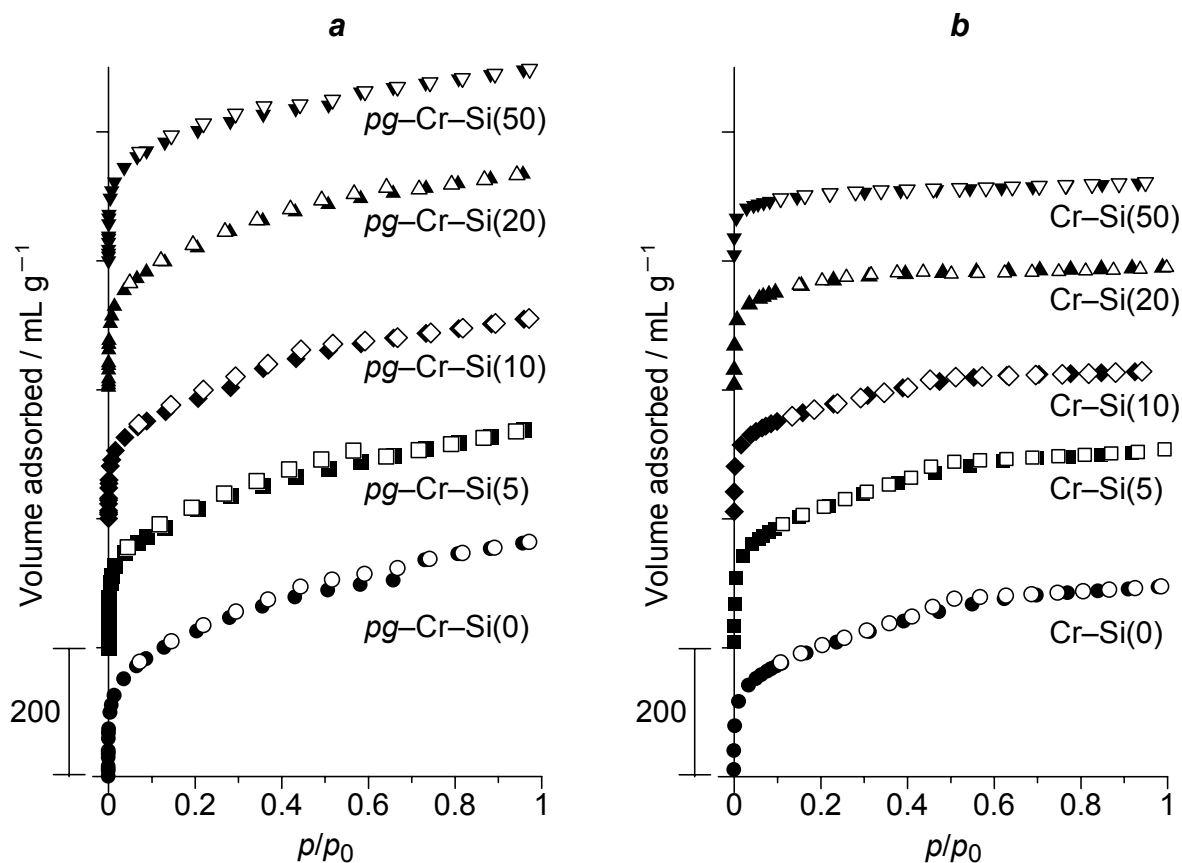

**Fig. S1.** N<sub>2</sub> adsorption (closed keys) and desorption (open keys) isotherm of (a) *pg*-Cr-Si(*x*) and (b) Cr-Si(*x*) catalysts.
